# Supplementary material for: The role of thrombophilia related polymorphisms in Coronavirus pandemic mortality
Source: Research Square preprint supplement (doi:10.21203/rs.3.rs-279902/v1), 2021-03-16
Supplement: Supplementary file 1 [file a27892db3e1388e2ffc097cf.xlsx]

## Sheet: Planilha1
Supplementary Table 2: References used to do the average frequency of every SNP analyzed for each country available.
Countries	rs17292650 *GGGG	rs2301612 *G	rs6003 *C	rs6050 *C	rs6048 *G	rs41348347*A	rs7080536*A	rs1799762*GGGGG	rs6092 *A	rs1801133*A	rs1801131*G	rs5985 *A	rs12029080*G	rs6687813*A	rs13109457*A	rs2066865*A	rs6025 *T	rs1799963 *A
Australia										35
Austria								13		36		100
Azores										37							37
Bangladesh	1	1	1	1	1	1	1	1	1	1	1	1	1	1	1	1	1	1
Barbados	1	1	1	1	1	1	1	1	1	1	1	1	1	1	1	1	1	1
Bosnia and Herzegovina								14
Botswana
Brazil								13		38-41	38-41	100					106	111
Bulgaria								13, 14									106
Canada								15	30, 31	35		100
Chile										42
China	1	1	1	1, 3-5	1	1	1	1, 16-19	1	1, 38, 43-46	1, 43, 44, 46	1	1	1	1	1	1	1
Colombia	1	1	1	1	1	1	1	1	1	1	1	1	1	1	1	1	1	1
Czechia								14		35, 38, 47	47						107
Denmark										48-50	48					101	106
Egypt								13, 14		38
Finland	1	1	1	1	1	1	1	1,14, 20	1	1, 38	1, 48	1	1	1	1	1	1	1
France										35, 51	51	100				102	106, 108, 102	106, 110
Gambia		1	1	1	1	1	1	1	1	1	1	1	1	1	1	1	1	1
Germany				6			11,12	14, 21		52-54							106, 109
Greece										55	55
Hungary												100
Iceland										50
India								14		38, 56-59	56, 57
Iran (Islamic Republic of)								22		38
Ireland										35, 60	60
Israel										35
Italy	1	1	1	1	1	1	1	1, 13	1	1, 38	1	1	1	1	1	1	1, 106, 110	103
Japan	1	1	1	1	1	1	1	1, 13	1	1, 38, 56, 61	1, 56, 61	1	1	1	1	1	1	0
Kenya	1	1	1	1	1	1	1	1	1	1	1	1	1	1	1	1	1	0
Kyrgyzstan										62	62
Mexico								23		63, 64							106
Morocco										38, 65	65
Netherlands								13, 24		39, 55		100				103	103, 106	103
Nigeria	1	1	1	1	1	1	1	1	1	1	1	1	1	1	1	1	1	1
Norway					9					35, 50						104	104	104
Pakistan	1	1	1	1	1	1	1	1	1	1, 66	1, 66	1	1	1	1	1	1	1
Peru	1	1	1	1	1	1	1	1	1	1	1	1	1	1	1	1	1	1
Philippines										67
Poland										54, 59, 68-71							106
Portugal										35	37
Puerto Rico	1	1	1	1	1	1	1	1	1	1, 72	1, 72	1	1	1	1	1	1	1
Republic of Korea								14, 25, 26	26	35, 73, 74	74
Republic of Moldova											75
										75
Russian Federation				7						62, 76-78	62
Serbia								14		79
Sierra Leone	1	1	1	1	1	1	1	1	1	1	1	1	1	1	1	1	1	1
Singapore										35, 80, 81	80
Slovenia										82	82						106
South Africa								13
Spain *	1	1	1	1	1	1	1	1	1	1, 83-85	1, 83	1	1	1	1	1	1, 106	1
Sri Lanka										86, 87	86, 87						86
Sweden									32	50, 88, 89	48, 88, 89						106
Switzerland										35
Taiwan								27	33	35, 38, 90-92	90-92, 99
The United Kingdom	1	1	1	1	10	1	1	0.4745	1	1, 93-95		100	1	1	1	1, 105	1, 105, 106	1
Tunisia								14		38, 62	62
Turkey								14, 28		35, 38							106
United States of America			2	8				29	34	96-98	96-98	100					106
Viet Nam	1	1	1	1	1	1	1	1	1	1	1	1	1	1	1	1	1	1
Reference List
1	Hunt SE, McLaren W, Gil L, Thormann A, Schuilenburg H, Sheppard D, et al. Ensembl variation resources. Database (Oxford). 2018;2018(8):1–12.
2	Zhang H, Morrison MA, DeWan A, Adams S, Andreoli M, Huynh N, et al. The NEI/NCBI dbGAP database: Genotypes and haplotypes that may specifically predispose to risk of neovascular age-related macular degeneration. BMC Med Genet. 2008;9:1–10.
3	Zhang J, Yu L, Yin Y, Lu Q, Lei L, Xiao J, et al. Association between two functional fibrinogen-related polymorphisms and ischemic stroke: A case-control study. Genet Test Mol Biomarkers. 2013;17(11):789–93.
4	Zeng Y, Zhang L, Hu Z, Yang Q, Ma M, Liu B, et al. Fibrinogen polymorphisms associated with sporadic cerebral hemorrhage in a Chinese population. J Clin Neurosci [Internet]. 2012;19(5):753–6. Available from: http://dx.doi.org/10.1016/j.jocn.2011.09.019
5	Li JF, Lin Y, Yang YH, Gan HL, Liang Y, Liu J, et al. Fibrinogen Aα Thr312Ala Polymorphism Specifically Contributes to Chronic Thromboembolic Pulmonary Hypertension by Increasing Fibrin Resistance. PLoS One. 2013;8(7):1–7.
6	Hoppe B, Häupl T, Skapenko A, Ziemer S, Tauber R, Salama A, et al. Fibrinogen and factor XIII A-subunit genotypes interactively influence C-reactive protein levels during inflammation. Ann Rheum Dis. 2012;71(7):1163–9.
7	Titov B V., Barsova RM, Martynov MY, Nikonova AA, Favorov A V., Gusev EI, et al. Polymorphic variants of the genes encoding intrleukin-6 and fibrinogen: Risk for ischemic stroke and fibrinogen levels. Mol Biol. 2012;46(1):85–93.
8	Carty C, Heagerty P, Heckbert S, Jarvik G, Lange L, Cushman M, et al. Fibrinogen and IL6 Gene Variants and IL-6 Levels in Relation to Plasma Fibrinogen Concentration and Cardiovascular Disease Risk in the Cardiovascular Health Study. Ann Hum Genet. 2010;74(1):1–10.
9	Greiff G, Pleym H, Stenseth R, Wahba A, Videm V. Genetic variation influences the risk of bleeding after cardiac surgery: Novel associations and validation of previous findings. Acta Anaesthesiol Scand. 2015;59(6):796–806.
10	Bezemer ID, Arellano AR, Tong CH, Rowland CM, Ireland HA, Bauer KA, et al. F9 Malmö, factor IX and deep vein thrombosis. Haematologica. 2009;94(5):693–9.
11	Hoppe B, Tolou F, Radtke H, Kiesewetter H, Dörner T, Salama A. Marburg I polymorphism of factor VII-activating protease is associated with idiopathic venous thromboembolism. Blood. 2005;105(4):1549–51.
12	Ahmad-Nejad P, Dempfle CE, Weiss C, Bugert P, Borggrefe M, Neumaier M. The G534E-polymorphism of the gene encoding the Factor VII-activating protease is a risk factor for venous thrombosis and recurrent events. Thromb Res. 2012;130(3):441–4.
13	Zhao L, Bracken MB, DeWan AT, Chen S. Association between the SERPINE1 (PAI-1) 4G/5G insertion/deletion promoter polymorphism (rs1799889) and pre-eclampsia: A systematic review and meta-analysis. Mol Hum Reprod. 2013;19(3):136–43.
14	Adler G, Mahmutbegovic E, Valjevac A, Adler MA, Mahmutbegovic N, Safranow K, et al. Association between - 675 ID, 4G/5G PAI-1 gene polymorphism and pregnancy loss: A systematic review. Acta Inform Medica. 2018;26(3):156–9.
15	Bentov Y, Brown TJ, Akbari MR, Royer R, Risch H, Rosen B, et al. Polymorphic variation of genes in the fibrinolytic system and the risk of ovarian cancer. PLoS One. 2009;4(6):4–7.
16	Huang X, Li Y, Huang Z, Wang C, Xu Z. Pai-1 Gene Variants and COC Use Are Associated with Stroke Risk: A Case-Control Study in the Han Chinese Women. J Mol Neurosci. 2014;54(4):803–10.
17	Fang Y, Zhang L, Zeng Z, Lian Y, Jia Y, Zhu H, et al. Promoter polymorphisms of SERPINE1 are associated with the antidepressant response to depression in Alzheimer’s disease. Neurosci Lett [Internet]. 2012;516(2):217–20. Available from: http://dx.doi.org/10.1016/j.neulet.2012.03.090
18	Wu AL, Xiong YS, Li ZQ, Liu YG, Quan Q, Wu LJ. Correlation between single nucleotide polymorphisms in hypoxia-related genes and susceptibility to acute high-altitude pulmonary edema. Genet Mol Res. 2015;14(3):11562–72.
19	Lu Y, Wang M, Liu Z, Wang F, Da Y, Jia J. No association between the promoter polymorphisms of PAI-1 gene and sporadic Alzheimer’s disease in Chinese Han population. Neurosci Lett. 2009;455(2):97–100.
20	Pastinen T, Perola M, Niini P, Terwilliger J, Salomaa V, Vartiainen E, et al. Array-based multiplex analysis of candidate genes reveals two independent and additive genetic risk factors for myocardial infarction in the Finnish population. Hum Mol Genet. 1998;7(9):1453–62.
21	Vossen CY, Hoffmeister M, Chang-Claude JC, Rosendaal FR, Brenner H. Clotting factor gene polymorphisms and colorectal cancer risk. J Clin Oncol. 2011;29(13):1722–7.
22	Ghaderian SMH, Akbarzadeh R, Mohajerani F, Khodaii Z, Salehpour S. The implication of single-nucleotide polymorphisms in ovarian hyperstimulation syndrome. Mol Reprod Dev. 2019;86(8):964–71.
23	Saínchez-Parada MG, Alvarez-Rodríguez BA, Goímez-Meda BC, Troyo-Sanromán R, Sánchez-Orozco LV, Zamora-Perez AL, et al. Association of genetic polymorphisms with histological grading of necroinflammation, staging of fibrosis, and liver function in mexicans with chronic hepatitis c virus infection. J Investig Med. 2013;61(7):1088–96.
24	Emonts M, Hazes MJMW, Houwing-Duistermaat JJ, van der Gaast-de Jongh CE, de Vogel L, Han HKH, et al. Polymorphisms in genes controlling inflammation and tissue repair in rheumatoid arthritis: A case control study. BMC Med Genet [Internet]. 2011;12(1):36. Available from: http://www.biomedcentral.com/1471-2350/12/36
25	Kim HO, Cho CH, Cho YJ, Cho SH, Yoon KS, Kim K Il. Significant associations of PAI-1 genetic polymorphisms with osteonecrosis of the femoral head. BMC Musculoskelet Disord [Internet]. 2011;12(1):160. Available from: http://www.biomedcentral.com/1471-2474/12/160
26	Jeon YJ, Kim YR, Lee BE, Cha SH, Moon MJ, Oh D, et al. Association of five common polymorphisms in the plasminogen activator inhibitor-1 gene with primary ovarian insufficiency. Fertil Steril [Internet]. 2014;101(3):825-832.e1. Available from: http://dx.doi.org/10.1016/j.fertnstert.2013.11.015
27	Su CK, Yeh KT, Yeh C Bin, Wang PH, Ho ESC, Chou MC, et al. Genetic polymorphism of the plasminogen activator inhibitor-1 is associated with an increased risk of endometrial cancer. J Surg Oncol. 2011;104(7):755–9.
28	Unsal T, Konac E, Yesilkaya E, Yilmaz A, Bideci A, Ilke Onen H, et al. Genetic polymorphisms of FSHR, CYP17, CYP1A1, CAPN10, INSR, SERPINE1 genes in adolescent girls with polycystic ovary syndrome. J Assist Reprod Genet. 2009;26(4):205–16.
29	Chang MH, Lindegren M Lou, Butler MA, Chanock SJ, Dowling NF, Gallagher M, et al. Prevalence in the United States of selected candidate gene variants: Third National Health and Nutrition Examination Survey, 1991-1994. Am J Epidemiol. 2009;169(1):54–66.
30	Bouchard L, Vohl MC, Lebel S, Hould FS, Marceau P, Bergeron J, et al. Contribution of genetic and metabolic syndrome to omental adipose tissue PAI-1 gene mRNA and plasma levels in obesity. Obes Surg. 2010;20(4):492–9.
31	Bouchard L, Mauriège P, Vohl MC, Bouchard C, Pérusse L. Plasminogen-activator inhibitor-1 polymorphisms are associated with obesity and fat distribution in the Québec Family Study: Evidence of interactions with menopause. Menopause. 2005;12(2):136–43.
32	Morange PE, Saut N, Alessi MC, Yudkin JS, Margaglione M, Di Minno G, et al. Association of plasminogen activator inhibitor (PAI)-1 (SERPINE1) SNPs with myocardial infarction, plasma PAI-1, and metabolic parameters: The HIFMECH study. Arterioscler Thromb Vasc Biol. 2007;27(10):2250–7.
33	Tsai SJ, Hong CJ, Liou YJ, Yu YWY, Chen TJ. Plasminogen activator inhibitor-1 gene is associated with major depression and antidepressant treatment response. Pharmacogenet Genomics. 2008;18(10):869–75.
34	Yende S, Angus DC, Ding J, Newman AB, Kellum JA, Li R, et al. 4G/5G plasminogen activator inhibitor-1 polymorphisms and haplotypes are associated with pneumonia. Am J Respir Crit Care Med. 2007;176(11):1129–37.
35	Clarke R, Bennett DA, Parish S, Verhoef P, Dötsch-Klerk M, Lathrop M, et al. Homocysteine and coronary heart disease: Meta-analysis of MTHFR case-control studies, avoiding publication bias. PLoS Med. 2012;9(2).
36	Weger W, Hofer A, Stanger O, Wolf P, El-Shabrawi Y, Renner W, et al. The methylenetetrahydrofolate reductase 677C>T gene polymorphism is not associated with chronic plaque psoriasis. Exp Dermatol. 2008;17(9):748–51.
37	Branco CC, Pereirinha T, Cabral R, Pacheco PR, Mota-Vieira L. Thrombotic genetic risk factors and warfarin pharmacogenetic variants in São Miguel’s healthy population (Azores). Thromb J. 2009;7:1–9.
38	Zhong JH, Rodríguez AC, Yang NN, Li LQ. Methylenetetrahydrofolate Reductase Gene Polymorphism and Risk of Type 2 Diabetes Mellitus. PLoS One. 2013;8(9).
39	Oliveira KC, Verreschi ITN, Sugawara EK, Silva VC, Galera BB, Galera MF, et al. C677T and A1298C polymorphisms of MTHFR gene and their relation to homocysteine levels in turner syndrome. Genet Test Mol Biomarkers. 2012;16(5):396–400.
40	Cardoso-dos-Santos AC, Tagliani-Ribeiro A, Matte U, Schuler-Faccini L. Genetic variants linked to folliculogenesis and successful pregnancy are not associated with twin births in a twins’ town. J Matern Neonatal Med [Internet]. 2019;0(0):1–8. Available from: https://doi.org/10.1080/14767058.2019.1573791
41	de Aguiar PKF, Coletta RD, de Oliveira AMLF, Machado RA, Furtado PGC, de Oliveira LA, et al. rs1801133c>t polymorphism in MTHFR is a risk factor for nonsyndromic cleft lip with or without cleft palate in the Brazilian population. Birth Defects Res Part A - Clin Mol Teratol. 2015;103(4):291–7.
42	Roco Á, Quiñones L, Agúndez JAG, García-Martín E, Squicciarini V, Miranda C, et al. Frequencies of 23 functionally significant variant alleles related with metabolism of antineoplastic drugs in the chilean population: Comparison with caucasian and asian populations. Front Genet. 2012;3(NOV):1–9.
43	Liu R, Zhao X, Liu X, Chen Z, Qiu L, Geng R, et al. Influences of ERCC1, ERCC2, XRCC1, GSTP1, GSTT1, and MTHFR polymorphisms on clinical outcomes in gastric cancer patients treated with EOF chemotherapy. Tumor Biol. 2016;37(2):1753–62.
44	Cheng X, Li T, Wang H, Zhu D, Ma C, Ma B, et al. Methylenetetrahydrofolate reductase gene polymorphisms and cerebral palsy in Chinese infants. J Hum Genet. 2011;56(1):17–21.
45	Li Y, Li M, Wang M, Zhou Y, Chang J, Xian Y, et al. Acute cerebrovascular disease following COVID-19: A single center, retrospective, observational study. Stroke Vasc Neurol. 2020;1–6.
46	Wang X, Qiao C, Wei L, Han Y, Cui N, Huang Z, et al. Associations of Polymorphisms in MTHFR Gene with the Risk of Age-Related Cataract in Chinese Han Population: A Genotype-Phenotype Analysis. PLoS One. 2015;10(12):e0145581.
47	Pardini B, Kumar R, Naccarati A, Prasad RB, Forsti A, Polakova V, et al. MTHFR and MTRR genotype and haplotype analysis and colorectal cancer susceptibility in a case-control study from the Czech Republic. Mutat Res - Genet Toxicol Environ Mutagen [Internet]. 2011;721(1):74–80. Available from: http://dx.doi.org/10.1016/j.mrgentox.2010.12.008
48	Bethke L, Webb E, Murray A, Schoemaker M, Feychting M, Lönn S, et al. Functional polymorphisms in folate metabolism genes influence the risk of meningioma and glioma. Cancer Epidemiol Biomarkers Prev. 2008;17(5):1195–202.
49	Husemoen LLN, Skaaby T, Jørgensen T, Thuesen BH, Fenger M, Grarup N, et al. MTHFR C677T genotype and cardiovascular risk in a general population without mandatory folic acid fortification. Eur J Nutr. 2014;53(7):1549–59.
50	Saetre P, Grove J, Børglum AD, Mors O, Werge T, Andreassen OA, et al. Methylenetetrahydrofolate reductase (MTHFR) C677T polymorphism and age at onset of schizophrenia: No consistent evidence for an association in the nordic population. Am J Med Genet Part B Neuropsychiatr Genet. 2012;159 B(8):981–6.
51	Küry S, Buecher B, Robiou-du-Pont S, Scoul C, Colman H, Le Neel T, et al. Low-penetrance alleles predisposing to sporadic colorectal cancers: A French case-controlled genetic association study. BMC Cancer. 2008;8.
52	Schürks M, Neumann FA, Kessler C, Diener HC, Kroemer HK, Kurth T, et al. MTHFR 677C>T polymorphism and cluster headache. Headache. 2011;51(2):201–7.
53	Roffman JL, Nitenson AZ, Agam Y, Isom M, Friedman JS, Dyckman KA, et al. A hypomethylating variant of MTHFR, 677C>T, blunts the neural response to errors in patients with schizophrenia and healthy individuals. PLoS One. 2011;6(9).
54	Hozyasz KK, Mostowska A, Szaflarska-Poplawska A, Lianeri M, Jagodzinski PP. Polymorphic variants of genes involved in homocysteine metabolism in celiac disease. Mol Biol Rep. 2012;39(3):3123–30.
55	Kalemi TG, Lambropoulos AF, Gueorguiev M, Chrisafi S, Papazisis KT, Kotsis A. The association of p53 mutations and p53 codon 72, Her 2 codon 655 and MTHFR C677T polymorphisms with breast cancer in Northern Greece. Cancer Lett. 2005;222(1):57–65.
56	Murthy J, Gurramkonda VB, Karthik N, Lakkakula BVKS. MTHFR C677T and A1298C polymorphisms and risk of nonsyndromic orofacial clefts in a south Indian population. Int J Pediatr Otorhinolaryngol [Internet]. 2014;78(2):339–42. Available from: http://dx.doi.org/10.1016/j.ijporl.2013.12.005
57	Mansoori N, Tripathi M, Luthra K, Alam R, Lakshmy R, Sharma S, et al. MTHFR (677 and 1298) and IL-6-174 G/C genes in pathogenesis of Alzheimer’s and vascular dementia and their epistatic interaction. Neurobiol Aging [Internet]. 2012;33(5):1003.e1-1003.e8. Available from: http://dx.doi.org/10.1016/j.neurobiolaging.2011.09.018
58	Umar M, Upadhyay R, Khurana R, Kumar S, Ghoshal UC, Mittal B. Evaluation of MTHFR677CT< polymorphism in prediction and prognosis of esophageal squamous cell carcinoma: A case-control study in a Northern Indian population. Nutr Cancer. 2010;62(6):743–9.
59	Chen H, Zhu J. C677T polymorphism of methylenetetrahydrofolate reductase may contribute to cervical cancer risk in complete over-dominant model. Med Hypotheses [Internet]. 2013;80(5):679–83. Available from: http://dx.doi.org/10.1016/j.mehy.2013.01.025
60	Mills JL, Molloy AM, Parle-mcdermott A, Troendle JF, Brody C, Conley MR, et al. Folate-Related Gene Polymorphisms as Risk Factors for Cleft Lip and Cleft Palate. 2009;82(9):636–43.
61	Yoshimi A, Aleksic B, Kawamura Y, Takahashi N, Yamada S, Usui H, et al. Gene-wide association study between the methylenetetrahydrofolate reductase gene (MTHFR) and schizophrenia in the Japanese population, with an updated meta-analysis on currently available data. Schizophr Res [Internet]. 2010;124(1–3):216–22. Available from: http://dx.doi.org/10.1016/j.schres.2010.07.011
62	Trifonova EA, Spiridonova MG, Stepanov VA. Genetic diversity and the structure of linkage disequilibrium in the methylenetetrahydrofolate reductase locus. Russ J Genet. 2008;44(10):1224–32.
63	Coral-Vázquez RM, Romero Arauz JF, Canizales-Quinteros S, Coronel A, Valencia Villalvazo EY, Hernández Rivera J, et al. Analysis of polymorphisms and haplotypes in genes associated with vascular tone, hypertension and oxidative stress in Mexican-Mestizo women with severe preeclampsia. Clin Biochem [Internet]. 2013;46(7–8):627–32. Available from: http://dx.doi.org/10.1016/j.clinbiochem.2012.12.016
64	Pérez-Razo JC, Cano-Martínez LJ, Vargas Alarcón G, Canizales-Quinteros S, Martínez-Rodríguez N, Canto P, et al. Functional Polymorphism rs13306560 of the MTHFR Gene Is Associated with Essential Hypertension in a Mexican-Mestizo Population. Circ Cardiovasc Genet. 2015;8(4):603–9.
65	Eloualid A, Abidi O, Charif M, El houate B, Benrahma H, Louanjli N, et al. Association of the MTHFR A1298C variant with unexplained severe male infertility. PLoS One. 2012;7(3):1–7.
66	Masud R, Qureshi IZ. Tetra primer ARMS-PCR relates folate/homocysteine pathway genes and ACE gene polymorphism with coronary artery disease. Mol Cell Biochem. 2011;355(1–2):289–97.
67	Lange LA, Croteau-Chonka DC, Marvelle AF, Qin L, Gaulton KJ, Kuzawa CW, et al. Genome-wide association study of homocysteine levels in Filipinos provides evidence for CPS1 in women and a stronger MTHFR effect in young adults. Hum Mol Genet. 2010;19(10):2050–8.
68	Mrozikiewicz-Rakowska B, Maroszek P, Nehring P, Sobczyk-Kopciol A, Krzyzewska M, Kaszuba AM, et al. Genetic and environmental predictors of chronic kidney disease in patients with type 2 diabetes and diabetic foot ulcer: A pilot study. J Physiol Pharmacol. 2015;66(5):751–61.
69	Szczepańska M, Mostowska A, Wirstlein P, Lianeri M, Marianowski P, Skrzypczak J, et al. Polymorphic variants of folate and choline metabolism genes and the risk of endometriosis-associated infertility. Eur J Obstet Gynecol Reprod Biol. 2011;157(1):67–72.
70	Chojnicka I, Sobczyk-Kopcioł A, Fudalej M, Fudalej S, Wojnar M, Waśkiewicz A, et al. No association between MTHFR C677T polymorphism and completed suicide. Gene. 2012;511(1):118–21.
71	Mostowska A, Hozyasz KK, Wojcicki P, Dziegelewska M, Jagodzinski PP. Associations of folate and choline metabolism gene polymorphisms with orofacial clefts. J Med Genet. 2010;47(12):809–15.
72	Devos L, Chanson A, Liu Z, Ciappio ED, Parnell LD, Mason JB, et al. Associations between single nucleotide polymorphisms in folate uptake and metabolizing genes with blood folate, homocysteine, and DNA uracil concentrations. Bone. 2008;23(1):1–7.
73	Hong SP, Ji S Il, Rhee H, Shin SK, Hwang SY, Lee SH, et al. A simple and accurate SNP scoring strategy based on typeIIS restriction endonuclease cleavage and matrix-assisted laser desorption/ionization mass spectrometry. BMC Genomics. 2008;9:1–10.
74	Kim SY, Lim JW, Kim JW, Park SY, Seo JT. Association between genetic polymorphisms in folate-related enzyme genes and infertile men with non-obstructive azoospermia. Syst Biol Reprod Med. 2015;61(5):286–92.
75	Varzari A, Deyneko I V., Tudor E, Turcan S. Polymorphisms of glutathione S-transferase and methylenetetrahydrofolate reductase genes in Moldavian patients with ulcerative colitis: Genotype-phenotype correlation. Meta Gene [Internet]. 2016;7:76–82. Available from: http://dx.doi.org/10.1016/j.mgene.2015.12.002
76	Salnikova LE, Smelaya T V., Moroz V V., Golubev AM, Rubanovich A V. Host genetic risk factors for community-acquired pneumonia. Gene [Internet]. 2013;518(2):449–56. Available from: http://dx.doi.org/10.1016/j.gene.2012.10.027
77	Salnikova LE, Belopolskaya OB, Zelinskaya NI, Rubanovich A V. The potential effect of gender in CYP1A1 and GSTM1 genotype-specific associations with pediatric brain tumor. Tumor Biol. 2013;34(5):2709–19.
78	Shadrina AS, Sevost’ianova KS, Shevela AI, Soldatsky EY, Seliverstov EI, Demekhova MY, et al. Polymorphisms in the MTHFR and MTR genes and the risk of varicose veins in ethnical Russians. Biomarkers. 2016;21(7):619–24.
79	Kujundzic B, Zeljic K, Supic G, Magic M, Stanimirovic D, Ilic V, et al. Association of vdr, cyp27b1, cyp24a1 and mthfr gene polymorphisms with oral lichen planus risk. Clin Oral Investig [Internet]. 2016;20(4):781–9. Available from: http://dx.doi.org/10.1007/s00784-015-1572-7
80	Inoue M, Robien K, Wang R, Van Den Berg DJ, Koh WP, Yu MC. Green tea intake, MTHFR/TYMS genotype and breast cancer risk: The Singapore Chinese Health Study. Carcinogenesis. 2008;29(10):1967–72.
81	Zhu F, Loh M, Hill J, Lee S, Koh KX, Lai KW, et al. Genetic factors associated with intestinal metaplasia in a high risk Singapore-Chinese population: A cohort study. BMC Gastroenterol. 2009;9:76.
82	Cerne JZ, Stegel V, Gersak K, Novakovic S. Lack of association between methylenetetrahydrofolate reductase genetic polymorphisms and postmenopausal breast cancer risk. Mol Med Rep. 2011;4(1):175–9.
83	Cáliz R, Del Amo J, Balsa A, Blanco F, Silva L, Sanmarti R, et al. The C677T polymorphism in the MTHFR gene is associated with the toxicity of methotrexate in a Spanish rheumatoid arthritis population. Scand J Rheumatol. 2012;41(1):10–4.
84	Camprubí C, Pladevall M, Grossmann M, Garrido N, Pons MC, Blanco J. Lack of association of MTHFR rs1801133 polymorphism and CTCFL mutations with sperm methylation errors in infertile patients. J Assist Reprod Genet. 2013;30(9):1125–31.
85	Mälarstig A, Buil A, Souto JC, Clarke R, Blanco-Vaca F, Fontcuberta J, et al. Identification of ZNF366 and PTPRD as novel determinants of plasma homocysteine in a family-based genome-wide association study. Blood. 2009;114(7):1417–22.
86	Dissanayake VHW, Weerasekera LY, Gammulla CG, Jayasekara RW. Prevalence of genetic thrombophilic polymorphisms in the Sri Lankan population - implications for association study design and clinical genetic testing services. Exp Mol Pathol [Internet]. 2009;87(2):159–62. Available from: http://dx.doi.org/10.1016/j.yexmp.2009.07.002
87	Dissanayake VHW, Sirisena ND, Weerasekera LY, Gammulla CG, Seneviratne HR, Jayasekara RW. Candidate gene study of genetic thrombophilic polymorphisms in pre-eclampsia and recurrent pregnancy loss in Sinhalese women. J Obstet Gynaecol Res. 2012;38(9):1168–76.
88	Ericson UC, Ivarsson MIL, Sonestedt E, Gullberg B, Carlson J, Olsson H, et al. Increased breast cancer risk at high plasma folate concentrations among women with the MTHFR 677T allele. Am J Clin Nutr. 2009;90(5):1380–9.
89	Ericson U, Sonestedt E, Ivarsson MIL, Gullberg B, Carlson J, Olsson H, et al. Folate intake, methylenetetrahydrofolate reductase polymorphisms, and breast cancer risk in women from the Malmö diet and cancer cohort. Cancer Epidemiol Biomarkers Prev. 2009;18(4):1101–10.
90	Liu CS, Tsai CW, Hsia TEC, Wang RF, Liu CJ, Hang LW, et al. Interaction of methylenetetrahydrofolate reductase genotype and smoking habit in taiwanese lung cancer patients. Cancer Genomics and Proteomics. 2009;6(6):325–9.
91	Wu HC, Chang CH, Tsai RY, Lin CH, Wang RF, Tsai CW, et al. Significant association of methylenetetrahydrofolate reductase single nucleotide polymorphisms with prostate cancer susceptibility in Taiwan. Anticancer Res. 2010;30(9):3573–7.
92	Huang CY, Chang WS, Shui HA, Hsieh YH, Loh CH, Wang HC, et al. Evaluation of the contribution of methylenetetrahydrofolate reductase genotypes to Taiwan breast cancer. Anticancer Res. 2014;34(8):4109–16.
93	Schiepers OJG, van Boxtel MPJ, Harris SE, Gow AJ, Pattie A, Brett CE, et al. MTHFR polymorphisms and cognitive ageing in the ninth decade: The Lothian Birth Cohort 1921. Genes, Brain Behav. 2011;10(3):354–64.
94	Samaan Z, Gaysina D, Cohen-Woods S, Craddock N, Jones L, Korszun A, et al. Methylenetetrahydrofolate Reductase Gene Variant (MTHFR C677T) and Migraine: A Case Control Study and Meta-analysis. BMC Neurol [Internet]. 2011;11(1):66. Available from: http://www.biomedcentral.com/1471-2377/11/66
95	Theodoratou E, Farrington SM, Tenesa A, McNeill G, Cetnarskyj R, Barnetson RA, et al. Dietary vitamin B6 intake and the risk of colorectal cancer. Cancer Epidemiol Biomarkers Prev. 2008;17(1):171–82.
96	Terry KL, Tworoger SS, Goode EL, Gates MA, Titus-Ernstoff L, Kelemen LE, et al. MTHFR polymorphisms in relation to ovarian cancer risk. Gynecol Oncol. 2010;119(2):319–24.
97	Liu P, Lu Y, Recker R. R, Deng H-W, Dvornyk V. Association analyses suggest multiple interaction effects of the methylenetetrahydrofolate reductase polymorphisms on timing of menarche and natural menopause in white women. Bone. 2008;23(1):1–7.
98	Albert MA, Pare G, Morris A, Rose L, Buring J, Ridker PM, et al. Candidate Genetic Variants in the Fibrinogen, Methylenetetrahydrofolate Reductase and Intercellular Adhesion Molecule-1 Genes and Plasma levels of Fibrinogen, Homocysteine, and Intercellular Adhesion Molecule-1 Among Various Race/ethnic Groups: Data from . Bone. 2008;23(1):1–7.
99	Liu CY, Hsu YH, Pan PC, Wu MT, Ho CK, Su L, et al. Maternal and offspring genetic variants of AKR1C3 and the risk of childhood leukemia. Carcinogenesis. 2008;29(5):984–90.
100	Wells PS, Anderson JL, Scarvelis DK, Doucette SP, Gagnon F. Factor XIII Val34Leu variant is protective against venous thromboembolism: A HuGE review and meta-analysis. Am J Epidemiol. 2006;164(2):101–9.
101	El-Galaly TC, Severinsen MT, Overvad K, Steffensen R, Vistisen AK, Tjønneland A, et al. Single nucleotide polymorphisms and the risk of venous thrombosis: Results from a Danish case-cohort study. Br J Haematol. 2013;160(6):838–41.
102	Bérard AM, Bedel A, Le Trequesser R, Freyburger G, Nurden A, Colomer S, et al. Novel Risk Factors for Premature Peripheral Arterial Occlusive Disease in Non-Diabetic Patients: A Case-Control Study. PLoS One. 2013;8(3).
103	Van Hylckama Vlieg A, Flinterman LE, Bare LA, Cannegieter SC, Reitsma PH, Arellano AR, et al. Genetic variations associated with recurrent venous thrombosis. Circ Cardiovasc Genet. 2014;7(6):806–13.
104	Horvei LD, Brækkan SK, Smith EN, Solomon T, Hindberg K, Frazer KA, et al. Joint effects of prothrombotic genotypes and body height on the risk of venous thromboembolism: the Tromsø study. J Thromb Haemost. 2018;16(1):83–9.
105	Klarin D, Emdin CA, Natarajan P, Conrad MF, Kethiresan S. Genetic Analysis of Venous Thromboembolism in UK Biobank Identifies the ZFPM2 Locus and Implicates Obesity as a Causal Risk Factor. Physiol Behav. 2018;176(1):1570–3.
106	Simone B, Stefano V De, Leoncini E, Zacho J, Martinelli I, Emmerich J, et al. Risk of venous thromboembolism associated with single and combined effects of Factor V Leiden, Prothrombin 20210A and Methylenetethraydrofolate reductase C677T: a meta-analysis involving over 11,000 cases and 21,000 controls. Bone. 2008;23(1):1–7.
107	Motovska Z, Kvasnicka J, Widimsky P, Petr R, Hajkova J, Bobcikova P, et al. Platelet glycoprotein GP VI 13254C allele is an independent risk factor of premature myocardial infarction. Thromb Res [Internet]. 2010;125(2):e61–4. Available from: http://dx.doi.org/10.1016/j.thromres.2009.09.002
108	Delluc A, Gourhant L, Lacut K, Mercier B, Audrezet MP, Nowak E, et al. Association of common genetic variations and idiopathic venous thromboembolism: Results from EDITh, a hospital-based case-control study. Thromb Haemost. 2010;103(6):1161–9.
109	Gerhardt A, Scharf RE, Beckmann MW, Struve S, Bender HG, Pillny M, et al. Prothrombin and Factor V Mutations in Women With a History of Thrombosis During Pregnancy and the Puerperium. Obstet Gynecol Surv. 2000;55(7):407–8.
110	Penco S, Buscema M, Patrosso M, Marocchi A, Grossi E. New application of intelligent agents in sporadic amyotrophic lateral sclerosis identifies unexpected specific genetic background. BMC Bioinformatics. 2008;9:1–12.
111	Born JPL, dos Santos BP, Secolin R, Gameleira FT, de Andrade TG, Machado LCH, et al. Ausência de associação entre o polimorfismo G20210A (rs1799963) da protrombina e epilepsia mioclônica juvenil. Arq Neuropsiquiatr. 2015;73(4):289–92.
